# Supplementary material
Source: PubMed Central journal article supplement (PMC6712577)
Supplement: NIHMS1045825-supplement-Supplementary_Information.pdf [file NIHMS1045825-supplement-Supplementary_Information.pdf]

**Neuron, Volume 103**

**Supplemental Information**

**High-Frequency Activation of Nucleus Accumbens**

**D1-MSNs Drives Excitatory Potentiation on D2-MSNs**

**T. Chase Francis, Hideaki Yano, Tyler G. Demarest, Hui Shen, and Antonello Bonci**

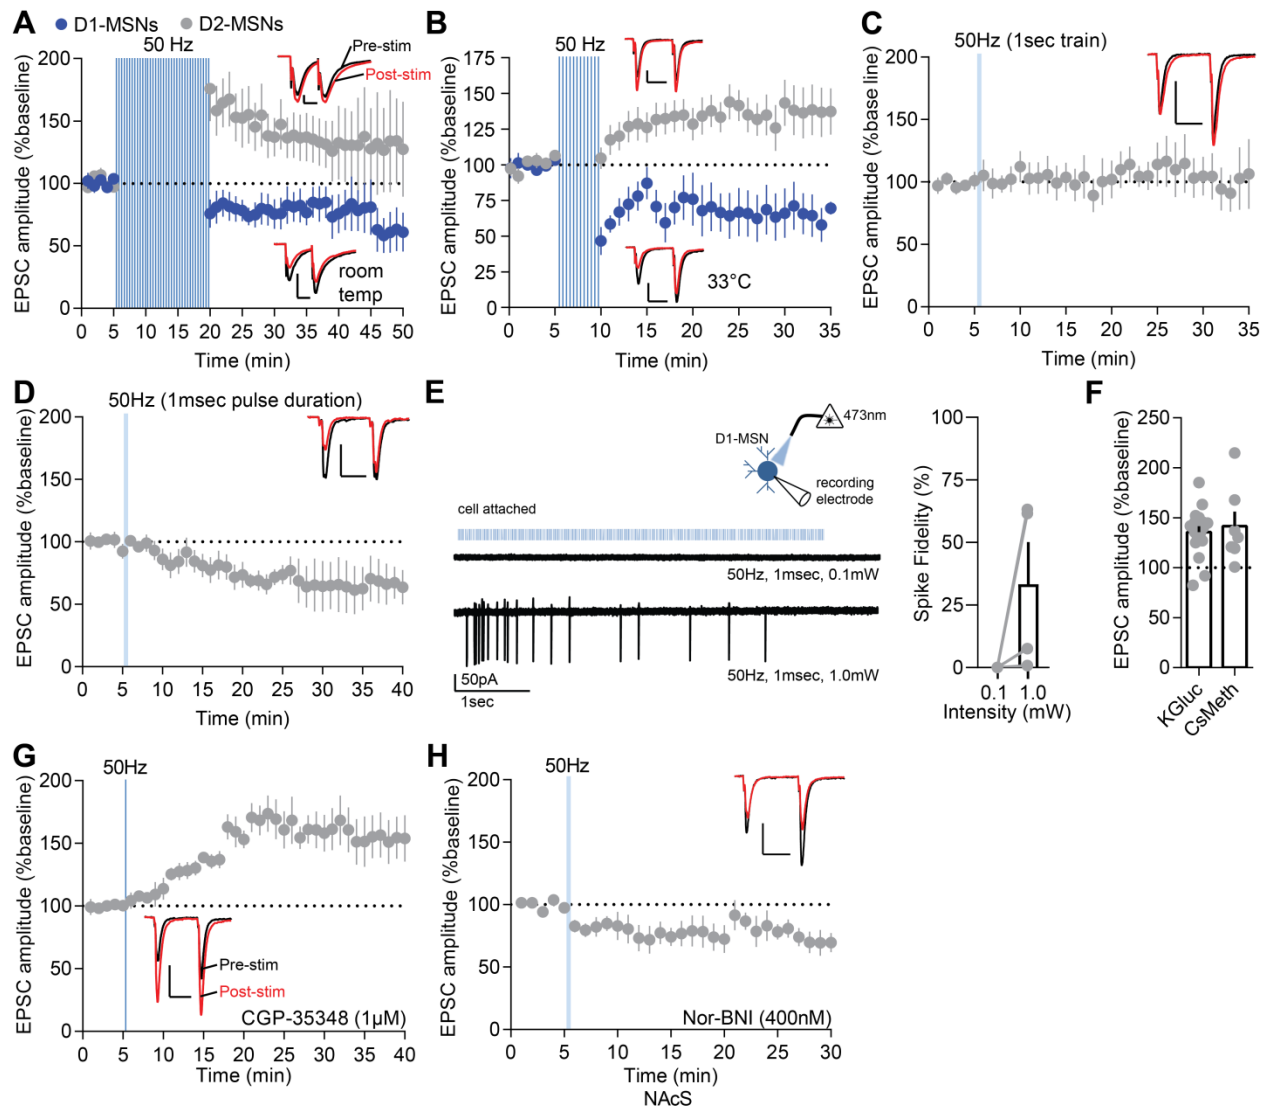

**Figure S1 (Related to Figure 1). Characterization of stimulation factors or receptors required for D2-MSN LLP in the NAcS and NAcC.** (A) 15 min of 50 Hz stimulation (5 sec light on, 5 sec light off) promotes excitatory potentiation on D2-MSNs (One-way RM ANOVA  $F_{11,55}=4.414$ ,  $P<0.0001$ ,  $n=6$ ) and no observable effect on D1-MSNs (One-way RM ANOVA  $F_{11,33}=1.122$ ,  $P=0.3758$ ,  $n=4$ ). (B) 5 min of 50 Hz stimulation (5 sec light on, 5 sec light off) promotes excitatory potentiation on D2-MSNs (One-way RM ANOVA  $F_{16,112}=15.57$ ,  $P=0.0016$ ,  $n=8$ ) and depression on D1-MSNs (One-way RM ANOVA  $F_{16,64}=37.11$ ,  $P<0.0001$ ,  $n=5$ ). (C) A 50 Hz train (10 msec pulse length) of one second was not capable of producing D2-MSN LLP (One-way RM ANOVA with Geisser-Greenhouse (GG) correction (GG):  $F_{2,123,12.74}=7.226$ ,  $P=0.5103$ ,  $n=6$ ). (D) Lowering 50 Hz light pulses (5 sec train) to 1 msec produced excitatory depression on D2-MSNs (One-way RM ANOVA with GG  $F_{3,020,18.12}=3.246$ ,  $P=0.0459$ ,  $n=7$ ). (E) 50 Hz light stimulation at 1 msec pulses is not capable of maintaining high fidelity firing. (F) No difference in stimulation-induced potentiation of EPSC amplitude is observed between cells recorded with K-gluconate internal (KGluc) or Cesium methanesulfonate (CsMeth) internal (Two-tailed  $t_6=0.4759$ ,  $P=0.6510$ ). (G) GABA<sub>A</sub> receptor (picrotoxin, 100  $\mu$ M) and GABA<sub>B</sub> receptor (CGP-35348, 1  $\mu$ M) has no effect on stimulation-induced potentiation (One-way RM ANOVA with GG:  $F_{1,734,12.14}=7.228$ ,  $P=0.0103$ ,  $n=8$ ). (H) Kappa receptor antagonism with nor-BNI did not block excitatory depression on D2-MSNs caused by 50 Hz D1-MSN stimulation in the NAcS (One-way RM ANOVA with GG  $F_{3,374,23.62}=2.688$ ,  $P=0.0638$ ,  $n=7$ ). \* $p<0.05$ .

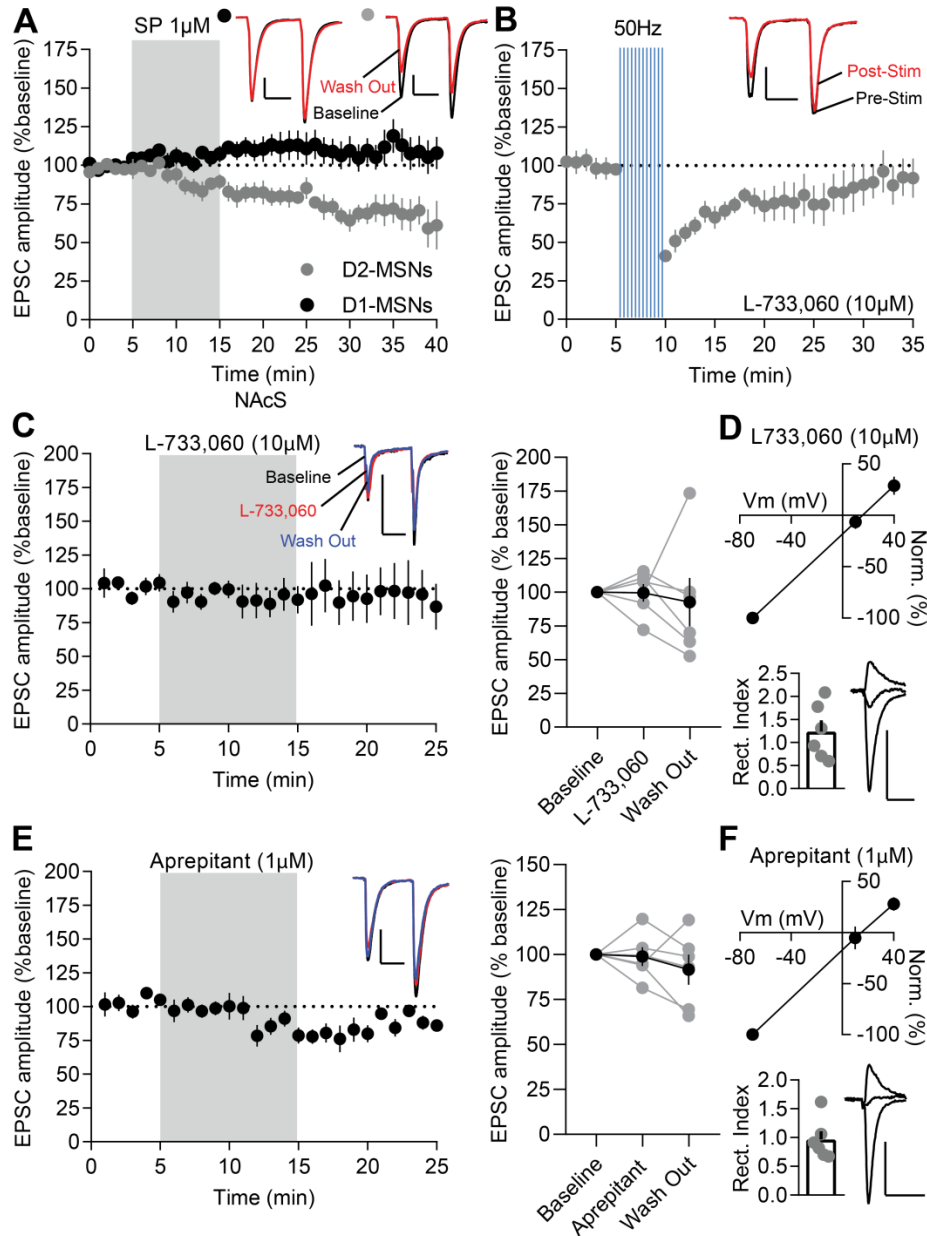

**Figure S2 (Related to Figure 2). Substance P promotes excitatory depression on D2-MSNs in the NAcS and NK1 receptor antagonists block stimulation induced D2-MSN LLP without affecting baseline synaptic properties.** (A) NAcS D2-MSNs EPSCs display excitatory depression (One-way RM ANOVA  $F_{20,140}=3.487$ ,  $P<0.0001$ ,  $n=8$ ) and NAcS D1-MSNs show no change (One-way RM ANOVA  $F_{20,80}=1.270$ ,  $P=0.2043$ ,  $n=10$ ) following bath application of substance P (1  $\mu$ M). Scale bar for synaptic recordings: 100 pA, 25 msec. (B) EPSCs are transiently depressed following 50 Hz stimulation in the presence of the NK1 receptor antagonist L-733,060 (10  $\mu$ M) (One-way RM ANOVA  $F_{11,55}=12.92$ ,  $P<0.0001$ ,  $n=6$ ). (C) L-733,060 does not affect EPSC amplitude in D2-MSNs (One-way RM ANOVA  $F_{2,10}=1.379$ ,  $P=0.8567$ ,  $n=6$ ). (D) L-733,060 does not affect AMPA receptor inward rectification at +40 mV (One-sample two-tailed  $t$ -test: theoretical mean 1.0, actual mean 1.234;  $t_5=0.9531$ ,  $P=0.3843$ ,  $n=6$ ). (E) Aprepitant does not affect EPSC amplitude in D2-MSNs (One-way RM ANOVA  $F_{2,10}=0.8344$ ,  $P=0.4623$ ,  $n=6$ ). (F) Aprepitant does not affect AMPA receptor inward rectification at +40 mV (One-sample  $t$ -test: theoretical mean 1.0, actual mean 0.9645;  $t_5=0.2476$ ,  $P=0.8143$ ,  $n=6$ ).

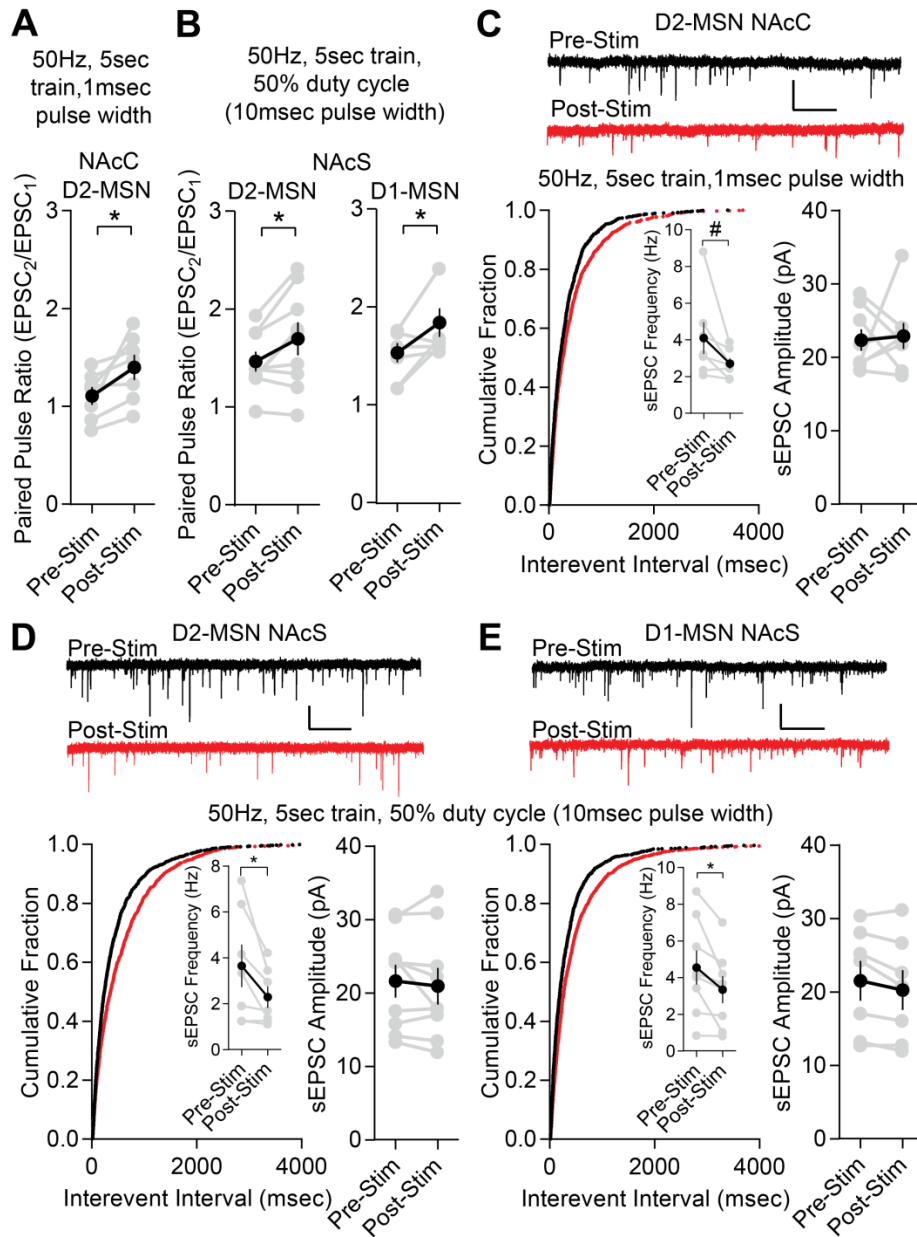

**Figure S3 (Related to Figure 3). Stimulation-induced excitatory depression in the NAcS or the NAcC (1 msec pulses) is governed by a pre-synaptic mechanism.** (A) Paired pulse ratios are significantly increased for NAcC D2-MSNs following 50 Hz D1-MSN stimulation (1 msec pulses) (Paired two-tailed,  $t_6=2.711$ ,  $P=0.0350$ ,  $n=7$ ). (B) Paired pulse ratios are significantly increased for NAcS D2-MSNs (Paired two-tailed  $t_6=2.092$ ,  $P=0.0407$ ,  $n=7$ ) and D1-MSNs (Paired two-tailed  $t_5=2.042$ ,  $P=0.0483$ ,  $n=6$ ). (C) NAcC D2-MSN display a trend toward a decrease in sEPSC frequency (Paired two-tailed  $t_6=2.114$ ,  $P=0.0789$ ,  $n=7$ ), but no change in amplitude (Paired two-tailed  $t_6=0.2319$ ,  $P=0.8223$ ,  $n=7$ ) following 50 Hz stimulation with 1 msec pulses. (D) NAcS D2-MSN sEPSC frequency (Paired two-tailed  $t_7=2.526$ ,  $P=0.0449$ ,  $n=8$ ), but not amplitude (Paired two-tailed  $t_7=0.7378$ ,  $P=0.4817$ ,  $n=8$ ) was significantly decreased following 50 Hz stimulation. (E) NAcS D1-MSN sEPSC frequency (Paired two-tailed  $t_6=2.995$ ,  $P=0.0201$ ,  $n=7$ ), but no change in amplitude was observed (Paired two-tailed  $t_6=2.295$ ,  $P=0.0615$ ,  $n=7$ ) was significantly decreased following 50Hz stimulation. Scale bars: 25pA, 1sec. \* $p<0.05$ , # $p=0.08$ .

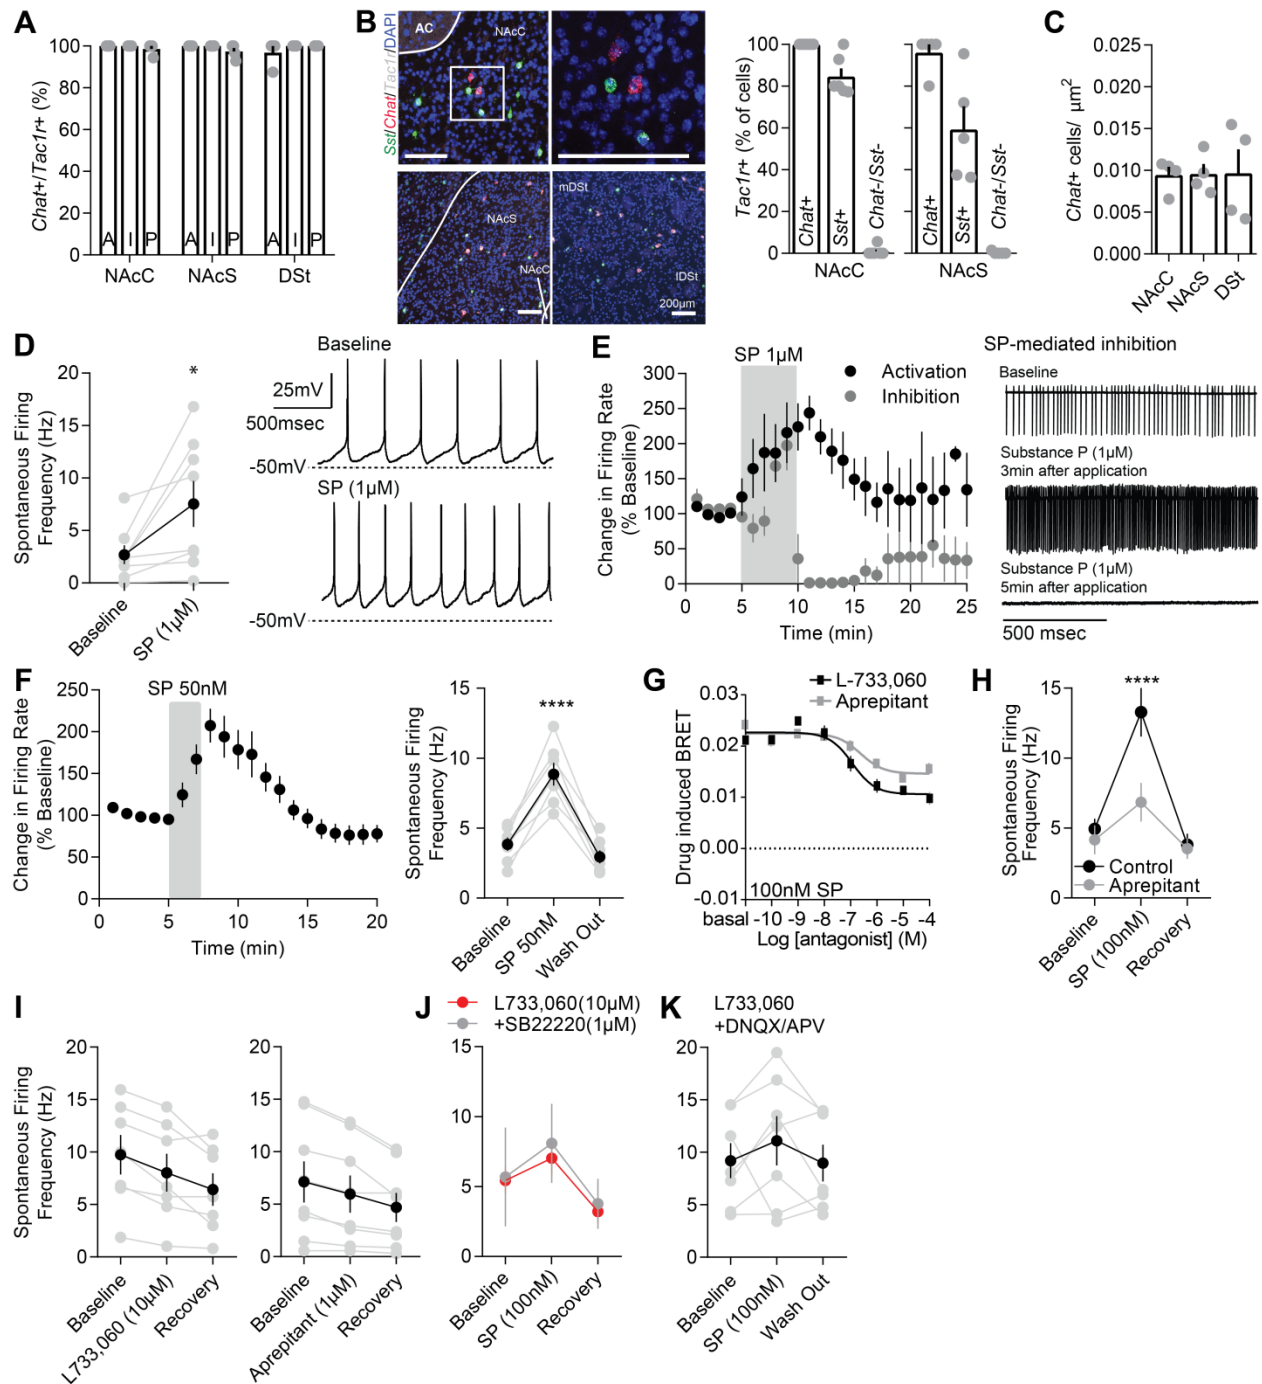

**Figure S4 (Related to Figure 4). Substance P enhances ChAT firing rate at varying concentrations via activation of the NK1 receptor.** (A) Coexpression of choline acetyltransferase (*Chat*) RNA and neurokinin 1 receptor (*Tac1r*) does not differ across Bregma coordinates from anterior (A), intermediate (I), and posterior (P) slices. (B) Nearly all *Chat* positive cells coexpress *Tac1r* RNA across all regions (NAcC, NAcS, and DSt). The remaining coexpression is found in somatostatin (*Sst*) RNA positive cells. (C) The density of *Chat* positive cells does not differ across all striatal regions assessed. (D) Whole cell spontaneous firing is significantly enhanced by bath application of substance P (1  $\mu$ M) (Paired  $t_7=2.631$ ,  $P=0.0339$ ,  $n=8$ ). (E) Spontaneous activity in a subset of ChAT neurons was rapidly enhanced then suppressed by substance P (1  $\mu$ M) via a depolarization block mechanism.

**(F)** Substance P (50 nM) significantly enhanced spontaneous firing rate of ChAT neurons (One-way RM ANOVA  $F_{12,84}=8.886$ ,  $P<0.0001$ ,  $n=8$ ). Spontaneous firing frequency is enhanced by substance P (50nM) (One-way RM ANOVA  $F_{2,12}=54.50$ ,  $P<0.0001$ ,  $n=8$ ). **(G)** Suppression of Gq-NK1 receptor substance P-induced BRET by increasing concentrations of NK1 receptor antagonists L-733,060 and aprepitant. **(H)** Aprepitant suppresses enhanced spontaneous firing of ChAT neurons caused by bath application of substance P (100 nM) (Two-way RM ANOVA Interaction  $F_{2,28}=9.537$ ,  $P<0.0001$ ,  $n=8$  cells per group). **(I)** Despite some rundown effects, spontaneous firing frequency is not altered by neurokinin antagonist bath application (L-733,060: One-way RM ANOVA  $F_{2,14}=5.868$   $P=0.0141$ ,  $n=8$ , Dunnett Baseline vs. L-733,060  $q_{14}=1.909$ ,  $p>0.05$ ; Aprepitant: One-way RM ANOVA  $F_{2,16}=4.066$   $P=0.0373$ ,  $n=9$ , Dunnett Baseline vs. Aprepitant  $q_{16}=1.740$ ,  $p>0.05$ ). **(J)** The addition of the NK3 receptor antagonist SB22220 does not further suppress the substance P antagonism by L-733,060 (Two-way RM ANOVA No Interaction  $F_{2,18}=0.1790$ ,  $P=0.8376$ ; Main effect of time  $F_{2,18}=17.42$ ,  $P<0.0001$ ,  $n=3-8$  cells per group). **(K)** Glutamate receptor antagonists DNQX and APV are not capable of further suppressing the substance P antagonism by L-733,060 (One-way RM ANOVA  $F_{2,12}=1.112$ ,  $P=0.3607$ ,  $n=7$ ).  $*p<0.05$ ,  $****p<0.0001$ .

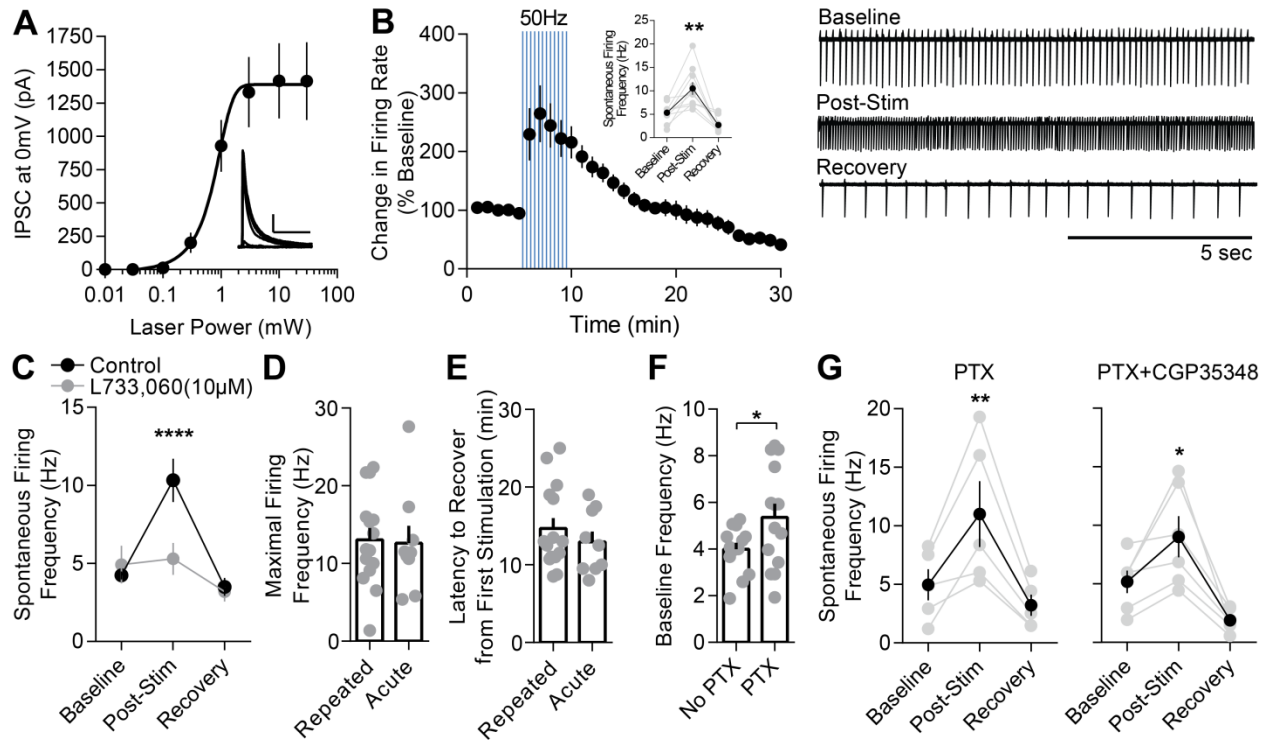

**Figure S5 (Related to Figure 5). Acute or repeated stimulation enhances ChAT activity and is not dependent on GABA receptor disinhibition.** (A) Increasing inhibitory post-synaptic currents in response to varying intensities of 473 nm blue light stimulation. (B) 5 min of repeated 50 Hz stimulation significantly enhances spontaneous firing rate of ChAT neurons (Frequency: One-way RM ANOVA  $F_{2,20}=17.87$ ,  $P<0.0001$ ,  $n=11$ , Baseline vs. Post-Stim  $q_{20}=3.909$ ,  $p<0.01$ ). (C) L-733,060 NK1 receptor antagonism blocks stimulation-induced enhancement in spontaneous ChAT firing frequency (Two-way RM ANOVA Interaction  $F_{2,22}=8.705$ ,  $P=0.0016$ ; Sidak's multiple comparisons (baseline vs. post-stim): L-733,060  $t_{22}=0.3409$ ,  $P<0.05$ ; control  $t_{22}=6.115$ ,  $P<0.0001$ ,  $n=6-7$ ). (D) No difference in maximal spontaneous firing frequency of ChAT neurons after repeated stimulation or acute stimulation (Unpaired two-tailed  $t_{22}=0.1626$ ,  $P=0.8723$ ,  $n=15,9$ ). (E) No difference in latency of spontaneous firing frequency to recover to baseline levels is observed after repeated stimulation or acute stimulation (Unpaired two-tailed  $t_{22}=0.8385$ ,  $P=0.4108$ ,  $n=15,9$  cells). (F) A small difference in baseline spontaneous firing frequency of ChAT in the presence of picrotoxin (PTX) neurons is observed (Unpaired two-tailed  $t_{25}=2.066$ ,  $P=0.0493$ ,  $n=13,14$  cells). (G) GABA receptor antagonists have no effect on D1-MSN 50 Hz stimulation-induced enhancement in firing frequency (GABA<sub>A</sub>: One-way RM ANOVA  $F_{2,8}=12.73$ ,  $P=0.0033$ ,  $n=5$ , baseline vs. Post-Stim  $q_8=3.727$ ,  $p<0.05$ ; GABA<sub>A</sub> and GABA<sub>B</sub>: One-way RM ANOVA  $F_{2,10}=$ ,  $P=0.0009$ ,  $n=6$ , baseline vs. Post-Stim  $q_{10}=2.982$ ,  $p<0.05$ ). \* $p<0.05$ , \*\* $p<0.01$ , \*\*\*\* $p<0.0001$ .

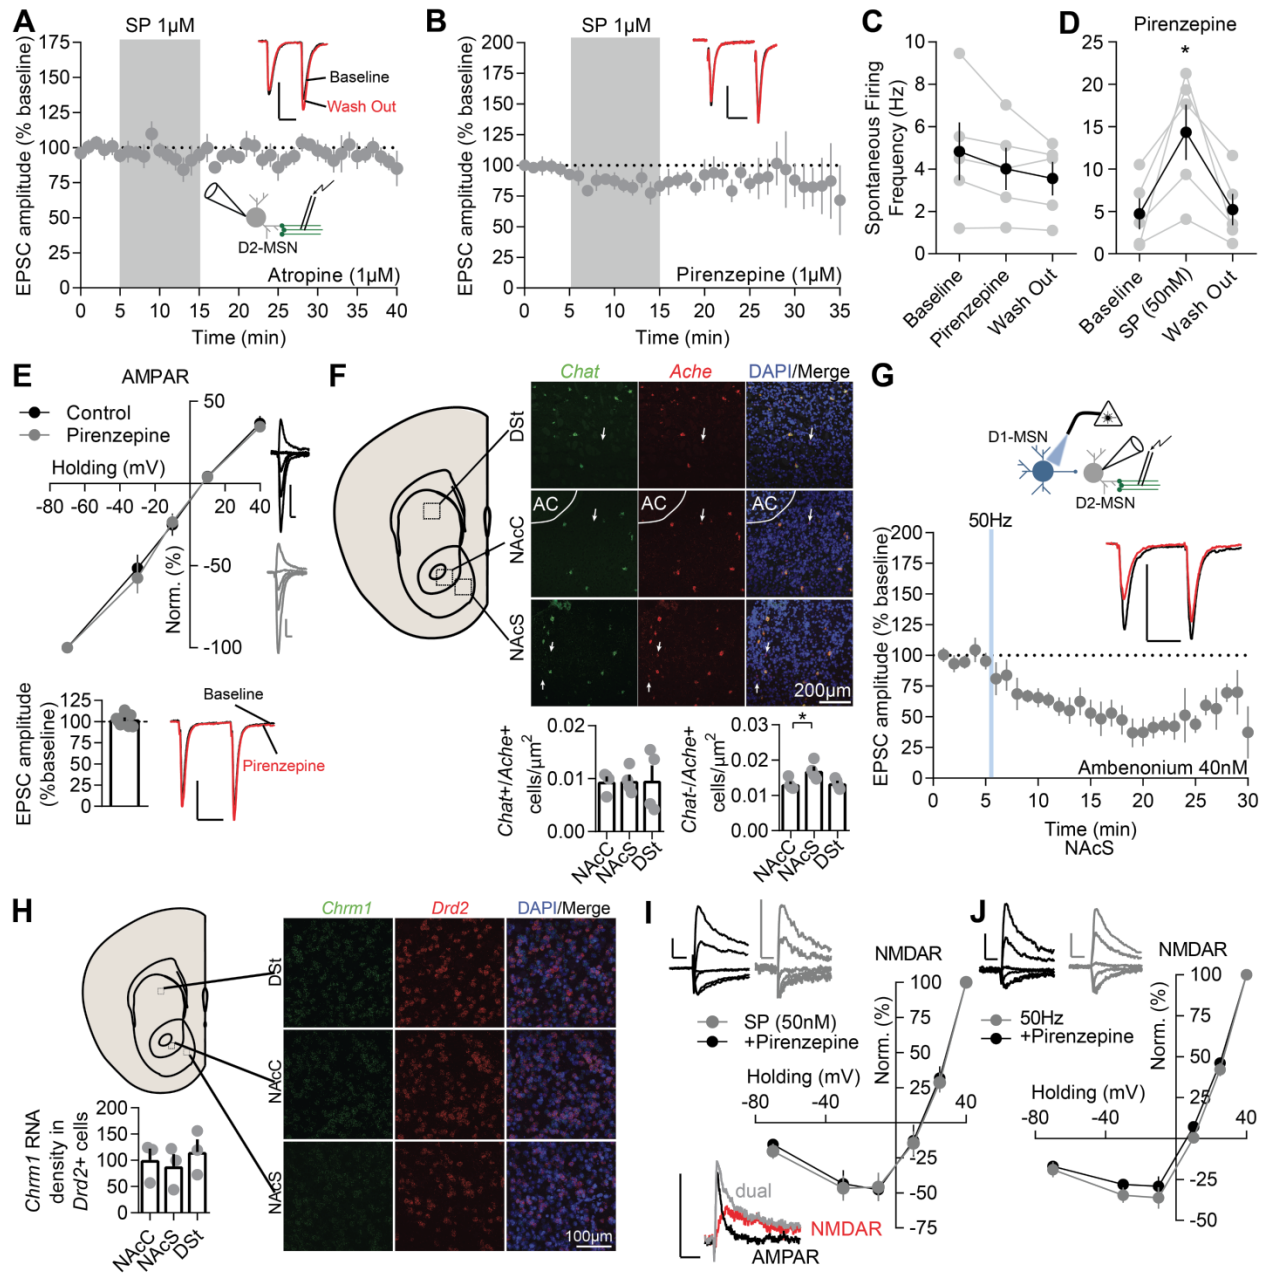

**Figure S6 (Related to Figure 6). Muscarinic 1 receptor blockade does not affect baseline firing rates and expression is not different across striatal compartments. (A)** Atropine (1 μM) blocks LLP on D2-MSNs caused by substance P (1 μM) (One-way RM ANOVA GG correction  $F_{2,885,23,08}=0.6758$ ,  $P=0.5702$ ,  $n=9$ ). Scale bar for synaptic recordings at -70 mV: 100 pA, 25 msec. **(B)** Pirenzepine (10 μM) blocks LLP on D2-MSNs caused by substance P (1 μM) (One-way RM ANOVA GG correction  $F_{2,541,15,25}=0.7473$ ,  $P=0.5200$ ,  $n=7$ ). **(C)** Pirenzepine alone does not affect spontaneous firing rate of ChAT neurons (One-way RM ANOVA  $F_{2,8}=2.712$ ,  $P=0.1261$ ,  $n=5$ ). **(D)** Pirenzepine does not affect substance P-induced enhancements in ChAT firing rate (One-way RM ANOVA  $F_{2,8}=10.15$ ,  $P=0.0064$ ,  $n=5$ ). **(E)** Pirenzepine does not affect the D2-MSN current-voltage relationship (Two-way RM ANOVA No interaction  $F_{5,40}=0.3566$ ,  $P=0.8749$ ,  $n=5$  cells per group), Pirenzepine does not affect EPSC amplitude in the NAcC at a 1 μM concentration (One-sample  $t_8=1.187$ ,  $P=0.2694$ ,  $n=9$ ). **(F)** Expression of acetylcholinesterase (*Ache*) RNA is found in all *Chat*<sup>+</sup> cells and some *Chat*<sup>-</sup> cells (arrows showing examples) across all regions of the striatum. No difference in density is observed in *Chat*<sup>+</sup> cells that coexpress *Ache* RNA (One-way



ANOVA:  $F_{2,9}=0.0028$ ,  $P=0.9972$ ,  $n=4$ ). Density of cells displaying coexpression of *Ache* RNA in *Chat*- is higher in the NAcS (One-way ANOVA:  $F_{2,9}=5.064$ ,  $P=0.0336$ ,  $n=4$ ; NAcC vs. NAcS:  $q_9=4.029$ ,  $p<0.05$ ). **(G)** Inhibition of acetylcholinesterase (AChE) with Ambenonium (40 nM) was not capable of blocking 50 Hz D1-MSN stimulation-mediated excitatory depression in the NAcS (One-way RM ANOVA with GG:  $F_{3,374,23,62}=4.300$ ,  $P=0.0587$ ,  $n=4$ ). **(H)** Muscarinic 1 receptor (*Chrm1*) RNA expression does not differ across striatal compartments (One-way RM ANOVA GG:  $F_{1,010,2,109}=8.368$ ,  $P=0.1006$ ,  $n=3$ ). **(I)** NMDA receptor currents on D2-MSNs do not differ between substance P and substance P+pirenzepine treatment (Two-way RM ANOVA No interaction  $F_{5,75}=0.9926$ ,  $P=0.0955$ ,  $n=8,9$  cells). Scale bar for NMDA receptor currents 50 pA, 25 msec. **(J)** NMDA receptor currents on D2-MSNs do not differ between D1-MSN 50 Hz stimulation and stimulation+pirenzepine (Two-way RM ANOVA No interaction  $F_{5,70}=0.4128$ ,  $P=0.8383$ ,  $n=9,7$  cells). \* $p<0.05$ .

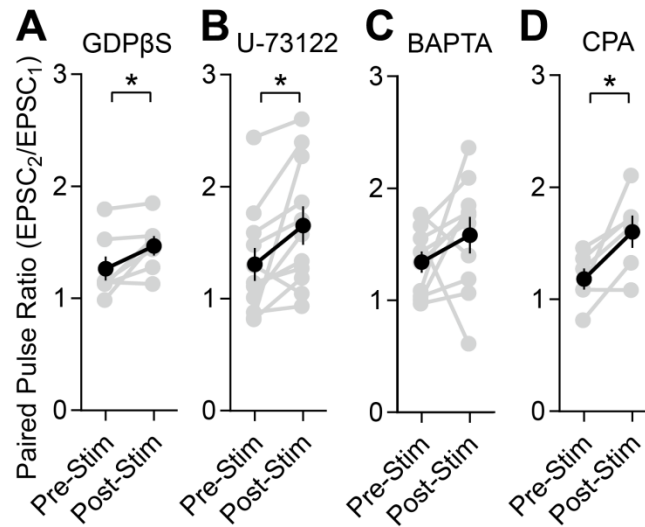

**Figure S7 (Related to Figure 7). Presynaptic excitatory depression on NAcC D2-MSNs is observed in response to 50 Hz D1-MSN stimulation in most conditions where muscarinic 1 receptor signaling is blocked. (A)** Blocking G-protein signaling with GDPβS enhances PPR (Paired two-tailed  $t_6=2.686$ ,  $P=0.0362$ ,  $n=7$ ) **(B)** Antagonism of PLC with U-73122 enhances PPR (Paired two-tailed  $t_{10}=2.654$ ,  $P=0.0242$ ,  $n=11$ ) **(C)** Calcium chelation with BAPTA does not change PPR (Paired two-tailed  $t_9=1.255$ ,  $P=0.2410$ ,  $n=10$ ). **(D)** Internal calcium store depletion with CPA enhances PPR (Paired two-tailed  $t_5=3.066$ ,  $P=0.0279$ ,  $n=6$ ). \* $p<0.05$

**Table S1. Exact Statistics for All Main Text Figures, Related to STAR Methods**

| Fig | Panel                | Test                                                                                                      | Subcategory               | Test Statistic                                    | P-value               | n   |
|-----|----------------------|-----------------------------------------------------------------------------------------------------------|---------------------------|---------------------------------------------------|-----------------------|-----|
| 1   | B                    | Mixed-effects model (some 50 Hz measurements unpaired)                                                    |                           | Frequency vs. Light Intensity<br>$F_{2,12}=4.928$ | 0.0266                | 5,9 |
|     |                      | Sidak's Multiple Comparison                                                                               | 50 Hz: 0.1 mW vs. 1.0 mW  | $t_{24}=4.569$                                    | 0.0004                | 5,9 |
|     | C                    | RM One-Way ANOVA, with Geisser-Greenhouse's correction (GG)                                               | D1-MSNs                   | $F_{3,732,29.86}= 1.187$                          | 0.3356                | 9   |
|     |                      |                                                                                                           | D2-MSNs                   | $F_{3,025,39.33}= 8.927$                          | 0.0001                | 14  |
|     | D                    | RM One-Way ANOVA, GG                                                                                      | D1-MSNs                   | $F_{3,339,16.70}= 2.883$                          | 0.0346                | 9   |
|     |                      |                                                                                                           | D2-MSNs                   | $F_{4,242,33.94}= 3.139$                          | 0.0491                | 8   |
|     | F                    | Dunnett's Multiple Comparisons from Panel C and D, Baseline vs. 20min time point, 15min after stimulation | D1-MSNs NAcC              | $q_8= 1.031$                                      | n.s., not significant | 9   |
|     |                      |                                                                                                           | D2-MSNs NAcC              | $q_{13}= 6.623$                                   | <0.001                | 14  |
|     |                      |                                                                                                           | D1-MSNs NAcS              | $q_7= 4.323$                                      | <0.05                 | 8   |
|     |                      |                                                                                                           | D2-MSNs NAcS              | $q_8= 5.369$                                      | <0.01                 | 9   |
|     | G                    | RM One-Way ANOVA, GG                                                                                      | 10 Hz                     | $F_{1,940,7.758}= 1.725$                          | 0.2397                | 5   |
|     |                      |                                                                                                           | 20 Hz                     | $F_{2,728,10.91}= 0.9608$                         | 0.4383                | 5   |
| 2   | A                    | RM One-Way ANOVA, GG                                                                                      | D1-MSNs                   | $F_{2,829,11.32}= 0.7073$                         | 0.5594                | 5   |
|     |                      |                                                                                                           | D2-MSNs                   | $F_{2,096,14.67}= 6.930$                          | 0.0071                | 8   |
|     | B                    | RM One-Way ANOVA, GG                                                                                      |                           | $F_{4,448,35.58}= 0.8104$                         | 0.5380                | 9   |
|     |                      |                                                                                                           |                           |                                                   |                       |     |
|     | D                    | RM One-Way ANOVA, GG                                                                                      | D1-MSNs                   | $F_{2,969,14.84}= 2.134$                          | 0.1396                | 6   |
|     |                      |                                                                                                           | D2-MSNs                   | $F_{2,189,28.45}= 3.400$                          | 0.0436                | 14  |
|     |                      | Dunnett's Multiple Comparisons from Panel D, Baseline vs. 20 min time point                               | D1-MSNs NAcC              | $q_5= 1.004$                                      | n.s.                  | 5   |
|     |                      |                                                                                                           | D2-MSNs NAcC              | $q_{13}= 3.759$                                   | <0.05                 | 14  |
|     | F                    | One-sample two-tailed <i>t</i> -test, at least 10 min after SP, Theoretical mean 100                      | D1-MSNs NAcC              | $t_7= 1.908$ , actual mean 84.53                  | 0.0980                | 8   |
|     |                      |                                                                                                           | D2-MSNs NAcC              | $t_{23}= 3.181$ , actual mean 133.4               | 0.0042                | 24  |
| G   | RM One-Way ANOVA, GG |                                                                                                           | $F_{3,280,22.96}= 0.6235$ | 0.6206                                            | 8                     |     |
| H   | RM One-Way ANOVA, GG | 1 to 2                                                                                                    | $F_{3,032,18.19}= 3.836$  | 0.0271                                            | 7                     |     |
|     |                      | 2 to 3                                                                                                    | $F_{2,616,13.08}= 1.951$  | 0.1749                                            | 7                     |     |
| 3   | A                    | Paired <i>t</i> -test, one-tailed                                                                         | D2-MSNs                   | $t_{14}= 0.9873$                                  | 0.1701                | 15  |
|     |                      |                                                                                                           | D1-MSNs                   | $t_{10}= 0.4445$                                  | 0.3331                | 11  |
|     | B                    | Paired <i>t</i> -test, one-tailed                                                                         | D2-MSNs                   | $t_{21}= 1.839$                                   | 0.0800                | 22  |
|     |                      |                                                                                                           | D1-MSNs                   | $t_7= 1.045$                                      | 0.3309                | 8   |
|     | C                    | Paired <i>t</i> -test, two-tailed                                                                         | sEPSC Freq                | $t_{11}= 0.7521$                                  | 0.4665                | 12  |
|     |                      |                                                                                                           | sEPSC Amp                 | $t_{11}= 4.500$                                   | 0.0009                | 12  |
|     | D                    | Paired <i>t</i> -test, two-tailed                                                                         | sEPSC Freq                | $t_{10}= 1.759$                                   | 0.1090                | 11  |

|   |   |                                                                                              |                                        |                               |         |               |
|---|---|----------------------------------------------------------------------------------------------|----------------------------------------|-------------------------------|---------|---------------|
|   |   |                                                                                              | sEPSC Amp                              | $t_{10}= 1.145$               | 0.2791  | 11            |
|   | E | Paired <i>t</i> -test, two-tailed                                                            | sEPSC Freq                             | $t_{16}= 0.8701$              | 0.3971  | 17            |
|   |   |                                                                                              | sEPSC Amp                              | $t_{16}= 4.206$               | 0.0007  | 17            |
|   | F | Paired <i>t</i> -test, two-tailed                                                            | sEPSC Freq                             | $t_7= 2.919$                  | 0.0224  | 8             |
|   |   |                                                                                              | sEPSC Amp                              | $t_7= 0.5790$                 | 0.3971  | 8             |
| 4 | B | One-Way ANOVA                                                                                |                                        | $F_{2,16}=1.062$              | 0.3690  | 6,6,7         |
|   | C | RM One-Way ANOVA, GG,<br>selected from set of neurons not<br>undergoing depolarization block |                                        | $F_{1.457,7.284}= 70.91$      | <0.0001 | 6             |
|   |   | Dunnett's Multiple Comparisons,<br>Baseline vs. SP                                           | Baseline vs. SP                        | $q_5= 3.759$                  | <0.01   | 6             |
|   | F | RM One-Way ANOVA, GG                                                                         | SP                                     | $F_{2.452,31.87}= 14.11$      | <0.0001 | 14            |
|   |   |                                                                                              | +L-733,060                             | $F_{2.824,16.94}= 13.44$      | =0.0001 | 7             |
|   |   | Dunnett's Multiple Comparisons,<br>Baseline vs. 10min                                        | SP                                     | $q_{13}= 3.759$               | <0.05   | 14            |
|   |   |                                                                                              | +L-733,060                             | $q_6= 2.435$                  | n.s.    | 7             |
|   | G | RM Two-Way ANOVA                                                                             | Control, L-733,060                     | Interaction $F_{2,26}= 13.25$ | 0.0001  | 7,8           |
|   |   | Sidak's multiple comparison                                                                  | Baseline vs. SP<br>(Control)           | $t_{26}=8.269$                | <0.0001 | 7,7           |
|   |   |                                                                                              | Baseline vs. SP (L-<br>733,060)        | $t_{26}=1.864$                | n.s.    | 7,7           |
| 5 | B | RM One-Way ANOVA, GG, time<br>course                                                         | 50 Hz                                  | $F_{1.632,14.69}= 19.75$      | 0.0001  | 10            |
|   |   |                                                                                              | +Aprepitant                            | $F_{2.586,18.10}= 6.150$      | 0.0059  | 8             |
|   |   | Dunnett's Multiple Comparisons,<br>Baseline vs. 10min                                        | 50 Hz                                  | $q_9= 4.100$                  | <0.05   | 10            |
|   |   |                                                                                              | +Aprepitant                            | $q_7= 0.1722$                 | n.s.    | 8             |
|   |   | RM Two-Way ANOVA,<br>Frequency (insert)                                                      | Frequency: 50Hz,<br>Aprepitant         | Interaction $F_{2,34}= 14.08$ | <0.0001 | 6,13          |
|   |   | Bonferroni multiple comparisons                                                              | Baseline vs. Post-<br>Stim (Control)   | $t_{34}=7.184$                | <0.0001 | 6,6           |
|   |   |                                                                                              | Baseline vs. Post<br>Stim (Aprepitant) | $t_{34}=0.8769$               | n.s.    | 13,13         |
|   | C | One-Way ANOVA                                                                                | 0.5, 1, 5, 5 repeated<br>(sec)         | $F_{3,29}= 4.837$             | 0.0075  | 4,8,10,<br>11 |
|   |   | Dunnett's Multiple Comparisons                                                               | 0.5 vs. 1                              | $q_{29}=0.988$                | 0.5746  | 4,8           |
|   |   |                                                                                              | 0.5 vs. 5                              | $q_{29}=2.728$                | 0.0250  | 4,10          |
|   |   |                                                                                              | 0.5 vs. 5 repeated                     | $q_{29}=3.122$                | 0.0098  | 4,11          |
|   | D | One-Way ANOVA                                                                                | 10,20,50 (Hz)                          | $F_{2,24}= 6.401$             | 0.0059  | 8,9,10        |
|   |   | Dunnett's Multiple Comparisons                                                               | 10 vs. 50                              | $q_{24}=4.465$                | 0.0114  | 8,10          |

|   |   |                                    |                        |                                                                                                                     |                                                                      |             |
|---|---|------------------------------------|------------------------|---------------------------------------------------------------------------------------------------------------------|----------------------------------------------------------------------|-------------|
|   |   |                                    | 20 vs. 50              | $q_{24}=4.164$                                                                                                      | 0.0187                                                               | 9,10        |
|   | E | One-Way ANOVA                      | 0, 10, 50 (Hz)         | $F_{3,32}= 11.42$                                                                                                   | <0.0001                                                              | 16, 7, 7, 6 |
|   |   | Dunnett's Multiple Comparisons     | 0 vs. 50               | $q_{32}= 7.579$                                                                                                     | <0.0001                                                              | 10,6        |
|   |   |                                    | 10 vs. 50              | $q_{32}= 5.262$                                                                                                     | 0.0040                                                               | 7,6         |
|   |   |                                    | 20 vs. 50              | $q_{32}= 7.339$                                                                                                     | <0.0001                                                              | 7,6         |
| 6 | A | RM One-Way ANOVA, GG               |                        | $F_{2,917,23,34}= 0.5407$                                                                                           | 0.6544                                                               | 9           |
|   | B | RM One-Way ANOVA, GG               |                        | $F_{2,714,21,71}= 1.528$                                                                                            | 0.2371                                                               | 9           |
|   | C | RM Two-Way ANOVA                   | SP, +Pirenzepine       | Interaction<br>$F_{4,60}=0.1183$ ,<br>Main effect for<br>treatment (Control<br>vs. Antagonist)<br>$F_{1,15}=0.2630$ | Interaction<br>0.1183,<br>Main effect<br>for<br>treatment<br>=0.0631 | 7,10        |
|   |   | Sidak's Multiple Comparison        | -70 vs. +40 mV         | $t_{75}= 3.107$                                                                                                     | <0.05                                                                | 7,10        |
|   |   | Unpaired two-tailed <i>t</i> -test | Rectification Index    | $t_{14}= 2.296$                                                                                                     | 0.0377                                                               | 7,10        |
|   | D | RM Two-Way ANOVA                   | 50 Hz,<br>+Pirenzepine | Interaction<br>$F_{5,100}=4.275$ ; Main<br>effect for treatment<br>$F_{1,20}=3.599$                                 | Interaction<br>0.0014;<br>Main effect<br>for<br>treatment<br>=0.0114 | 10, 12      |
|   |   | Sidak's Multiple Comparison        | -70 vs. +40 mV         | $t_{120}= 4.744$                                                                                                    | <0.0001                                                              | 10, 12      |
|   |   | Unpaired two-tailed <i>t</i> -test | Rectification Index    | $t_{22}= 2.452$                                                                                                     | 0.0226                                                               | 10, 12      |
|   | E | RM Two-Way ANOVA                   |                        | Interaction<br>$F_{2,14}=4.694$ ; Main<br>effect for treatment<br>$F_{2,14}=3.204$                                  | Interaction<br>0.0275;<br>Treatment<br>0.0207                        | 5,4         |
|   | F | RM Two-Way ANOVA                   |                        | Interaction<br>$F_{2,24}=7.508$ ; Main<br>effect for treatment<br>$F_{1,12}=9.586$                                  | Interaction<br>0.0149;<br>Treatment<br>0.0093                        | 7,7         |
| 7 | A | RM One-Way ANOVA GG                |                        | $F_{3,672,25,71}= 2.902$                                                                                            | 0.0452                                                               | 8           |
|   | B | RM Two-Way ANOVA                   |                        | Interaction<br>$F_{2,10}=11.87$ ; Main<br>effect for condition<br>$F_{1,5}=5.073$ ;                                 | Interaction<br><0.0001;<br>Condition<br>0.0741                       | 6,6         |
|   |   | Bonferroni multiple comparison     | +40 mV                 | $t_{10}=5.152$                                                                                                      | <0.01                                                                | 6,6         |
|   |   | Paired two-tailed <i>t</i> -test   | Rectification Index    | $t_5=3.742$                                                                                                         | 0.0134                                                               | 6,6         |
|   | C | RM One-Way ANOVA GG                |                        | $F_{2,919,23,35}= 3.088$                                                                                            | 0.0479                                                               | 9           |
|   | D | One-sample <i>t</i> -test          | Rectification Index    | Theoretical mean<br>1.0; Actual mean<br>0.9379; $t_7=0.471$                                                         | 0.6500                                                               | 8           |

|   |                                  |                     |                                                                                         |                                                |     |
|---|----------------------------------|---------------------|-----------------------------------------------------------------------------------------|------------------------------------------------|-----|
| E | RM One-Way ANOVA GG              |                     | $F_{2,268,18.15} = 0.373$                                                               | 0.7192                                         | 9   |
| F | RM Two-Way ANOVA, post-hoc       | +40 mV              | Interaction<br>$F_{2,12} = 20.20$ ; Main<br>effect for condition<br>$F_{1,6} = 33.40$ ; | Interaction<br><0.0001;<br>Condition<br>0.0012 | 7,7 |
|   | Bonferroni multiple comparison   | +40 mV              | $t_{12} = 8.806$                                                                        | <0.0001                                        | 7,7 |
|   | Paired two-tailed <i>t</i> -test | Rectification Index | $t_6 = 3.095$                                                                           | 0.0213                                         | 7,7 |
| G | RM One-Way ANOVA GG              |                     | $F_{2,707,18.95} = 2.45$                                                                | 0.0995                                         | 8   |
| H | One-sample <i>t</i> -test        | Rectification Index | Theoretical mean<br>1.0; Actual mean<br>1.021; $t_7 = 0.173$                            | 0.8670                                         | 8   |
